# Supplementary material for: 7,8-Dihydroxyflavone protects neurons against oxygen-glucose deprivation induced apoptosis and activates the TrkB/Akt pathway
Source: PeerJ. 2022 Feb 15;10:e12886. doi: 10.7717/peerj.12886 (PMC8855723; doi:10.7717/peerj.12886)
Supplement: Data S2 [file peerj-10-12886-s003.xlsx]

## Sheet: Sheet1
CCK-8
	Control	OGD/R	0.25	0.5	0.75	1
	1	0.257985	0.343333	0.671437	0.475597	0.364082
	1	0.237014	0.295522	0.640058	0.41738	0.344023
	1	0.235473	0.32518	0.652834	0.40394	0.350973
	1	0.282569	0.335417	0.719996	0.466122	0.367212
	1	0.23538	0.347011	0.667924	0.469754	0.335144
	1	0.23614	0.313232	0.713018	0.524405	0.335418
	1	0.223091	0.297324	0.660714	0.421488	0.357536
	1	0.246576	0.342213	0.679437	0.445945	0.377041
